# Supplementary material for: Production of assorted nanoparticle structures using silver–cerium redox chemistry for inactivation of coronavirus
Source: Royal Society of Chemistry journal article supplement (doi:10.1039/d5ma00962f), 2026-01-01
Supplement: d5ma00962f1.pdf [file d5ma00962f1.pdf]

## **Production of Assorted Nanoparticle Structures using Silver-Cerium Redox Chemistry for Inactivation of Coronavirus**

Craig J. Neal<sup>a\*</sup>, Muhammad Hassan Mehmood Kalyar<sup>b</sup>, Elayaraja Kolanthai<sup>a</sup>, Maria V. Bolen<sup>b†</sup>, Griffith D. Parks<sup>b</sup>, Sudipta Seal<sup>a,c\*</sup>

<sup>a</sup>. Materials Science & Engineering Department, Advanced Materials Processing and Analysis Center (AMPAC), University of Central Florida, Orlando, FL, 32816, United States

<sup>b</sup>. Burnett School of Biomedical Sciences, College of Medicine, University of Central Florida, Orlando, Florida 32827, United States

<sup>c</sup>. Biionix Faculty Cluster, College of Medicine, Nanoscience Technology Center, University of Central Florida, Orlando, Florida 32827, United States

\* Corresponding authors e-mails: Craig.Neal@ucf.edu, [Sudipta.Seal@ucf.edu](mailto:Sudipta.Seal@ucf.edu)

|                       |    | Peak Center | FWHM   | Average Crystallite Diameter(nm) |
|-----------------------|----|-------------|--------|----------------------------------|
| 1:1.2 (60-min mixing) | Ce | 28.55       | 1.277  | 6.418                            |
|                       | Ag | 38.22       | 0.5625 | 14.95                            |
| 1:1 (60-min mixing)   | Ce | 28.29       | 1.202  | 6.813                            |
|                       | Ag | 37.95       | 0.4499 | 18.67                            |
| 1:0.5 (60-min mixing) | Ce | 28.60       | 0.8798 | 9.319                            |
|                       | Ag | 38.17       | 0.3606 | 23.32                            |
| 1:0.2 (60-min mixing) | Ce | 28.57       | 0.8423 | 9.732                            |
|                       | Ag | 38.14       | 0.3659 | 22.97                            |
| 1:1.2 (2-min mixing)  | Ce | 28.54       | 1.000  | 8.190                            |
|                       | Ag | 38.16       | 0.3874 | 21.70                            |
| 1:0.5 (2-min mixing)  | Ce | 28.51       | 1.005  | 8.157                            |
|                       | Ag | 38.10       | 0.3820 | 22.00                            |
| 1:0.2 (2-min mixing)  | Ce | 28.67       | 0.9573 | 8.565                            |
|                       | Ag | 38.23       | 0.4521 | 18.                              |

**Table S1** Average Crystallite Diameter determined via the Scherrer equation. Lower angle peaks for high density atomic planes were baseline-corrected and fit with Gaussian functions in *Origin* graphing software. Full-width half maxima and analytically determined peak centers were then used to calculate average crystallite diameters using the Scherrer equation as

$$D_{hkl} = k * \lambda / (B_{hkl} * \cos(\theta)) \quad (1)$$

where  $D_{hkl}$  is the calculated average crystal diameter,  $k$  is a shape factor approximated as 0.9,  $\lambda$  is the x-ray source wavelength (1.540598 Å), and  $\theta$  is the Bragg angle of the diffraction peak (hkl).

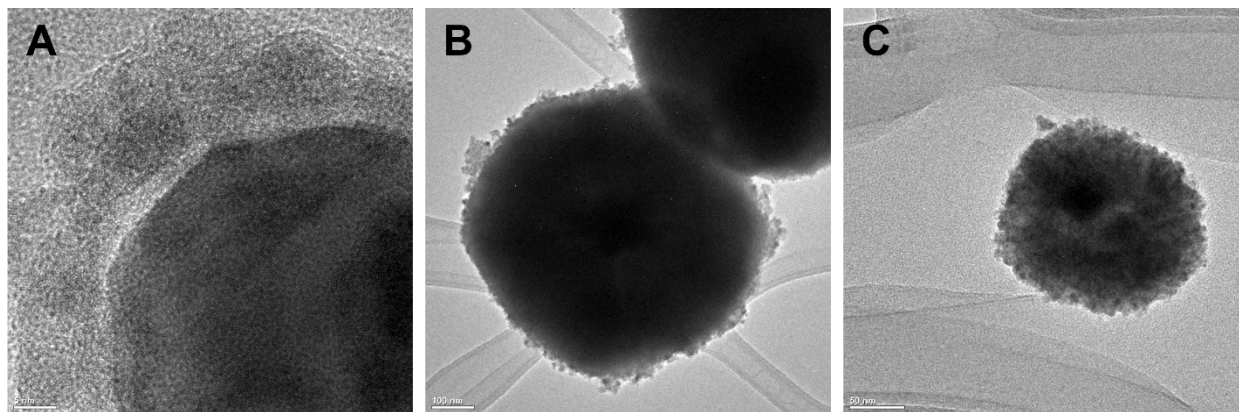

**Figure S1** Additional High-resolution Transmission Electron Microscopy images. Formulations 1.2, 0.5, and 0.2 images, A to C, respectively.

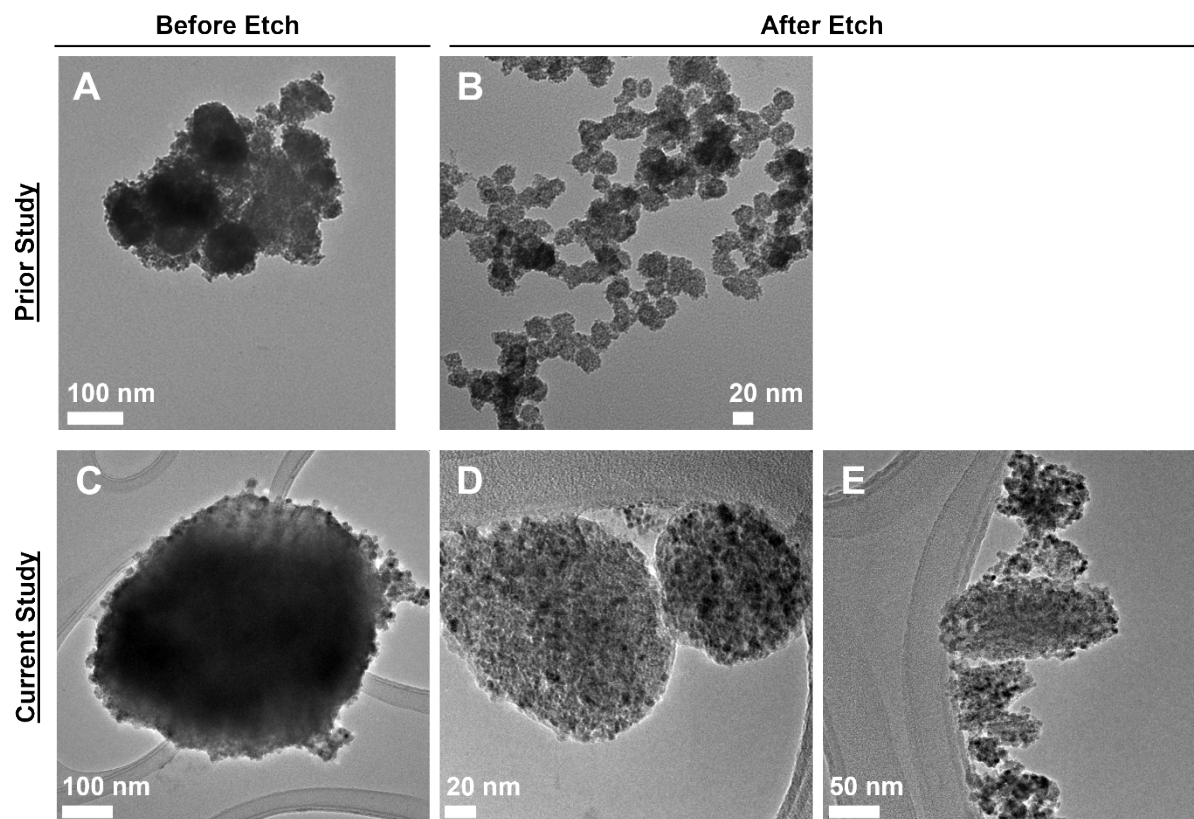

**Figure S2** Comparison between Nanoparticles from Prior and Current Synthesis Methods before and after Etching. TEM images of AgCNP1 (**A,B**) and *Formulation 0.2* (**C-E**) before (**A,C**) and after (**B,D,E**) etching in concentrated ammonium hydroxide. Following etching, the surface of particles appear to be decorated with small silver nanophases. Dissolution of larger silver phases may occur in *Formulation 0.2* (**C**), as seen for AgCNP1 (**A**), and potentially lead to re-deposition of silver at the particle surface from diamine complexes.

**A**

| Sample Name     | SOD Activity (%)   |                    |                   |
|-----------------|--------------------|--------------------|-------------------|
|                 | 0.08 $\mu\text{M}$ | 0.83 $\mu\text{M}$ | 8.3 $\mu\text{M}$ |
| Formulation 0.2 | 5.55+/-9.63        | 22.2+/-9.62        | 98.6+/-0.25       |
| Formulation 0.5 | 0.00+/-0.00        | 33.3+/-0.01        | 99.6+/-0.25       |
| Formulation 1.2 | 0.00+/-0.00        | 72.2+/-9.62        | 99.3+/-0.19       |

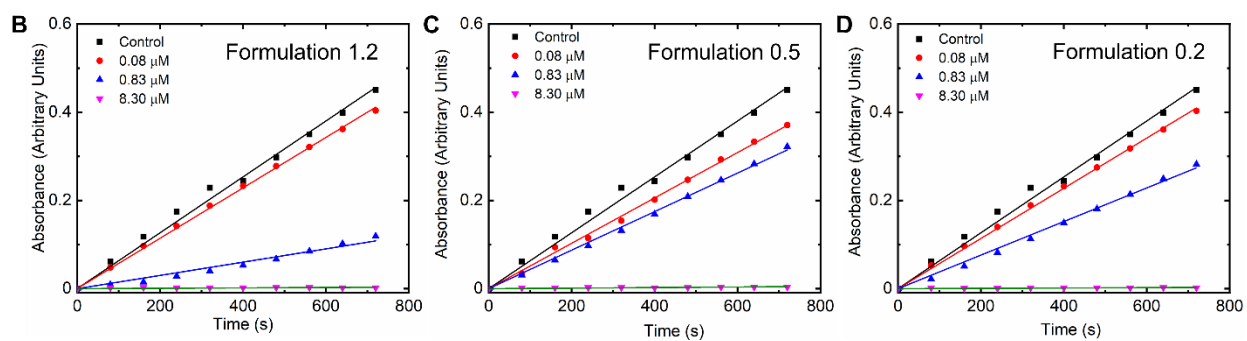

**Figure S3** Superoxide Dismutase-mimetic assay. Determined percent SOD activity data shows a positive correlation with nanoparticle concentration and silver content.
